# Supplementary material
Source: PubMed Central journal article supplement (PMC2706936)
Supplement: NIHMS81934-supplement-01.pdf [file NIHMS81934-supplement-01.pdf]

| Protein | Peptide Sequence | Q1<br>m/z | Q3<br>m/z | Ion<br>Type | Peptide Peak<br>Area (CPS) | Other Peak<br>Area (CPS) | Total Peak<br>Area (CPS) | % (Peptide Peak<br>Area vs Total<br>Peak Area) |  | Unique? |
|---------|------------------|-----------|-----------|-------------|----------------------------|--------------------------|--------------------------|------------------------------------------------|--|---------|
|         |                  |           |           |             |                            |                          |                          |                                                |  |         |
| ACTB    | SYELPDGQVITIGNE  | 895.9     | 1086.6    | y10         | 57000                      | 824                      | 57824                    | 98.57498616                                    |  | Y       |
|         | R                |           |           |             |                            |                          |                          |                                                |  |         |
|         | SYELPDGQVITIGNE  | 895.9     | 706.4     | y13, 2+     | 328000                     | 5020                     | 333020                   | 98.49258303                                    |  | Y       |
|         | R                |           |           |             |                            |                          |                          |                                                |  |         |
|         | SYELPDGQVITIGNE  | 895.9     | 1298.7    | y12         | 170000                     | 2370                     | 172370                   | 98.62505076                                    |  | N       |
|         | R                |           |           |             |                            |                          |                          |                                                |  |         |
|         | SYELPDGQVITIGNE  | 895.9     | 475.2     | y4          | 373000                     | 2750                     | 375750                   | 99.26813041                                    |  | N       |
|         | R                |           |           |             |                            |                          |                          |                                                |  |         |
|         | SYELPDGQVITIGNE  | 895.9     | 689.4     | y6          | 358000                     | 3650                     | 361650                   | 98.9907369                                     |  | N       |
| R       |                  |           |           |             |                            |                          |                          |                                                |  |         |
|         | HQGV MVGMGQK     | 586.3     | 249.1     | b2-NH3      | 8730                       | 13500                    | 22230                    | 39.27125506                                    |  | Y       |
|         | HQGV MVGMGQK     | 586.3     | 422.2     | b4          | 11900                      | 4020                     | 15920                    | 74.74874372                                    |  | Y       |
|         | HQGV MVGMGQK     | 586.3     | 906.5     | y9          | 27900                      | 1500                     | 29400                    | 94.89795918                                    |  | N       |



|            |       |       |        |         |      |         |             |   |
|------------|-------|-------|--------|---------|------|---------|-------------|---|
| AVFPSIVGR  | 473.3 | 314.2 | y3-NH3 | 1850000 | 0    | 1850000 | 100         | Y |
| AVFPSIVGR  | 473.3 | 610.4 | y6-H2O | 71700   | 0    | 71700   | 100         | Y |
| AVFPSIVGR  | 473.3 | 628.4 | y6     | 3520000 | 0    | 3520000 | 100         | N |
| AVFPSIVGR  | 473.3 | 531.3 | y5     | 867000  | 0    | 867000  | 100         | N |
| AVFPSIVGR  | 473.3 | 331.2 | y3     | 356000  | 0    | 356000  | 100         | N |
| GYSFTTTAER | 566.8 | 437.2 | b4-H2O | 165000  | 0    | 165000  | 100         | Y |
| GYSFTTTAER | 566.8 | 308.1 | b3     | 505000  | 2390 | 507390  | 99.52896194 | Y |
| GYSFTTTAER | 566.8 | 678.3 | y6     | 806000  | 4600 | 810600  | 99.43251912 | N |
| GYSFTTTAER | 566.8 | 912.4 | y8     | 436000  | 1670 | 437670  | 99.61843398 | N |
| GYSFTTTAER | 566.8 | 577.3 | y5     | 406000  | 2150 | 408150  | 99.47323288 | N |
| FPSIVGRPR  | 514.8 | 881.5 | y8     | 1780    | 1570 | 3350    | 53.13432836 | Y |
| FPSIVGRPR  | 514.8 | 697.4 | y6     | 4720    | 1260 | 5980    | 78.92976589 | Y |
| FPSIVGRPR  | 514.8 | 584.4 | y5     | 3450    | 1260 | 4710    | 73.24840764 | N |
| FPSIVGRPR  | 514.8 | 485.3 | y4     | 2050    | 2080 | 4130    | 49.63680387 | N |
| FPSIVGRPR  | 514.8 | 784.5 | y7     | 5140    | 1250 | 6390    | 80.43818466 | N |

|                 |       |        |     |        |       |        |             |   |
|-----------------|-------|--------|-----|--------|-------|--------|-------------|---|
| PEEHPVLLTEAPLNP | 892.5 | 1291.8 | y12 | 3700   | 0     | 3700   | 100         | Y |
| K               |       |        |     |        |       |        |             |   |
| PEEHPVLLTEAPLNP | 892.5 | 639.4  | y6  | 4440   | 870   | 5310   | 83.61581921 | Y |
| K               |       |        |     |        |       |        |             |   |
| PEEHPVLLTEAPLNP | 892.5 | 493.2  | b4  | 20200  | 0     | 20200  | 100         | N |
| K               |       |        |     |        |       |        |             |   |
| PEEHPVLLTEAPLNP | 892.5 | 568.3  | y5  | 6710   | 372   | 7082   | 94.74724654 | N |
| K               |       |        |     |        |       |        |             |   |
| PEEHPVLLTEAPLNP | 892.5 | 1216.6 | b11 | 2500   | 0     | 2500   | 100         | N |
| K               |       |        |     |        |       |        |             |   |
| PDGQVITIGNER    | 649.8 | 398.2  | b4  | 629    | 4180  | 4809   | 13.07964234 | Y |
| PDGQVITIGNER    | 649.8 | 901.5  | y8  | 2520   | 1300  | 3820   | 65.96858639 | Y |
| PDGQVITIGNER    | 649.8 | 802.4  | y7  | 1670   | 3350  | 5020   | 33.26693227 | N |
| PDGQVITIGNER    | 649.8 | 689.4  | y6  | 1290   | 1930  | 3220   | 40.0621118  | N |
| PDGQVITIGNER    | 649.8 | 475.2  | y4  | 234    | 1590  | 1824   | 12.82894737 | N |
| TVLSGGTTMYPGIA  | 819.9 | 628.3  | y6  | 122000 | 11400 | 133400 | 91.45427286 | Y |

|              |                 |       |        |         |        |       |        |             |   |
|--------------|-----------------|-------|--------|---------|--------|-------|--------|-------------|---|
|              | DR              |       |        |         |        |       |        |             |   |
|              | TVLSSGGTTMYPGIA | 819.9 | 1011.5 | b10     | 11100  | 0     | 11100  | 100         | Y |
|              | DR              |       |        |         |        |       |        |             |   |
|              | TVLSSGGTTMYPGIA | 819.9 | 791.4  | y7      | 66400  | 0     | 66400  | 100         | N |
|              | DR              |       |        |         |        |       |        |             |   |
|              | TVLSSGGTTMYPGIA | 819.9 | 201.1  | b2      | 55300  | 0     | 55300  | 100         | N |
|              | DR              |       |        |         |        |       |        |             |   |
|              | TVLSSGGTTMYPGIA | 819.9 | 1023.5 | y9      | 16000  | 0     | 16000  | 100         | N |
|              | DR              |       |        |         |        |       |        |             |   |
|              | TTGIVMDSGDGVTH  | 695.3 | 918.4  | y9      | 6940   | 0     | 6940   | 100         | Y |
|              | TTGIVMDSGDGVTH  | 695.3 | 355.2  | b4-H2O  | 1210   | 3720  | 4930   | 24.54361055 | Y |
|              | TTGIVMDSGDGVTH  | 695.3 | 1017.4 | y10     | 3400   | 0     | 3400   | 100         | N |
|              | TTGIVMDSGDGVTH  | 695.3 | 242.1  | b3-H2O  | 3090   | 5300  | 8390   | 36.829559   | N |
|              | TTGIVMDSGDGVTH  | 695.3 | 787.3  | y8      | 6180   | 3380  | 9560   | 64.64435146 | N |
| <b>THBS1</b> | FVFGTTPEDILR    | 697.7 | 742.4  | y6      | 572000 | 0     | 572000 | 100         | Y |
|              | FVFGTTPEDILR    | 697.7 | 574.8  | y10, 2+ | 420000 | 5770  | 425770 | 98.64480823 | Y |
|              | FVFGTTPEDILR    | 697.7 | 219.1  | a2      | 358000 | 13800 | 371800 | 96.28832706 | N |

|                     |       |        |                    |        |        |        |             |   |
|---------------------|-------|--------|--------------------|--------|--------|--------|-------------|---|
|                     | 697.7 | 688.9  | y12-<br>H2O,<br>2+ | 258000 | 187000 | 445000 | 57.97752809 | N |
| FVFGTTPEDILR        |       |        |                    |        |        |        |             |   |
|                     | 697.7 | 565.8  | y10-<br>H2O,<br>2+ | 145000 | 8620   | 153620 | 94.38875146 | N |
| FVFGTTPEDILR        |       |        |                    |        |        |        |             |   |
| GGVNDNFQGVLQN<br>VR | 808.9 | 1083.5 | b11-<br>H2O        | 525    | 0      | 525    | 100         | Y |
| GGVNDNFQGVLQN<br>VR | 808.9 | 871.4  | b9-H2O             | 4720   | 0      | 4720   | 100         | Y |
| GGVNDNFQGVLQN<br>VR | 808.9 | 629.4  | y5                 | 154000 | 0      | 154000 | 100         | N |
| GGVNDNFQGVLQN<br>VR | 808.9 | 913.5  | y8                 | 100000 | 0      | 100000 | 100         | N |
| GGVNDNFQGVLQN<br>VR | 808.9 | 785.5  | y7                 | 180000 | 0      | 180000 | 100         | N |

|                  |        |        |         |       |     |       |             |   |
|------------------|--------|--------|---------|-------|-----|-------|-------------|---|
| IEDANLIPPVPDDKF  | 1290.2 | 906    | y16, 2+ | 10400 | 0   | 10400 | 100         | Y |
| QDLVDAVR         |        |        |         |       |     |       |             |   |
| IEDANLIPPVPDDKF  | 1290.2 | 672.4  | y6      | 1270  | 0   | 1270  | 100         | Y |
| QDLVDAVR         |        |        |         |       |     |       |             |   |
| IEDANLIPPVPDDKF  | 1290.2 | 752.4  | b7-NH3  | 1800  | 0   | 1800  | 100         | Y |
| QDLVDAVR         |        |        |         |       |     |       |             |   |
| IEDANLIPPVPDDKF  | 1290.2 | 769.4  | y7-H2O  | 3070  | 0   | 3070  | 100         | Y |
| QDLVDAVR         |        |        |         |       |     |       |             |   |
| IEDANLIPPVPDDKF  | 1290.2 | 1111.6 | y20, 2+ | 110   | 0   | 110   | 100         | N |
| QDLVDAVR         |        |        |         |       |     |       |             |   |
| IPESGGDNSVFDIFEL | 1098   | 864.5  | y8      | 1120  | 0   | 1120  | 100         | Y |
| TGAAR            |        |        |         |       |     |       |             |   |
| IPESGGDNSVFDIFEL | 1098   | 1092.6 | y10     | 3850  | 0   | 3850  | 100         | Y |
| TGAAR            |        |        |         |       |     |       |             |   |
| IPESGGDNSVFDIFEL | 1098   | 1239.6 | y11     | 3890  | 0   | 3890  | 100         | N |
| TGAAR            |        |        |         |       |     |       |             |   |
| IPESGGDNSVFDIFEL | 1098   | 1041.5 | y20, 2+ | 21700 | 414 | 22114 | 98.12788279 | N |

TGAAR

|                  |      |       |    |      |      |      |             |   |
|------------------|------|-------|----|------|------|------|-------------|---|
| IPESGGDNSVFDIFEL | 1098 | 977.5 | y9 | 5560 | 2060 | 7620 | 72.96587927 | N |
|------------------|------|-------|----|------|------|------|-------------|---|

TGAAR

|             |       |       |    |      |       |       |             |   |
|-------------|-------|-------|----|------|-------|-------|-------------|---|
| IMADSGPIYDK | 613.3 | 425.2 | y3 | 1870 | 12200 | 14070 | 13.29068941 | Y |
|-------------|-------|-------|----|------|-------|-------|-------------|---|

|             |       |       |        |      |     |      |             |   |
|-------------|-------|-------|--------|------|-----|------|-------------|---|
| IMADSGPIYDK | 613.3 | 180.2 | y4, 3+ | 2420 | 726 | 3146 | 76.92307692 | Y |
|-------------|-------|-------|--------|------|-----|------|-------------|---|

|             |       |       |    |       |     |       |           |   |
|-------------|-------|-------|----|-------|-----|-------|-----------|---|
| IMADSGPIYDK | 613.3 | 965.5 | y9 | 10100 | 662 | 10762 | 93.848727 | N |
|-------------|-------|-------|----|-------|-----|-------|-----------|---|

|             |       |       |    |      |       |       |             |   |
|-------------|-------|-------|----|------|-------|-------|-------------|---|
| IMADSGPIYDK | 613.3 | 779.4 | y7 | 8700 | 13600 | 22300 | 39.01345291 | N |
|-------------|-------|-------|----|------|-------|-------|-------------|---|

|             |       |       |    |     |      |      |             |   |
|-------------|-------|-------|----|-----|------|------|-------------|---|
| IMADSGPIYDK | 613.3 | 894.4 | y8 | 761 | 4580 | 5341 | 14.24826811 | N |
|-------------|-------|-------|----|-----|------|------|-------------|---|

|               |       |       |    |      |      |      |             |   |
|---------------|-------|-------|----|------|------|------|-------------|---|
| QVTQSYWDTNPTR | 789.9 | 889.4 | y7 | 5900 | 1050 | 6950 | 84.89208633 | Y |
|---------------|-------|-------|----|------|------|------|-------------|---|

|               |       |       |    |      |      |      |             |   |
|---------------|-------|-------|----|------|------|------|-------------|---|
| QVTQSYWDTNPTR | 789.9 | 876.4 | b7 | 1520 | 2310 | 3830 | 39.68668407 | Y |
|---------------|-------|-------|----|------|------|------|-------------|---|

|               |       |       |    |      |      |       |             |   |
|---------------|-------|-------|----|------|------|-------|-------------|---|
| QVTQSYWDTNPTR | 789.9 | 373.2 | y3 | 7870 | 5850 | 13720 | 57.36151603 | N |
|---------------|-------|-------|----|------|------|-------|-------------|---|

|               |       |       |    |      |      |       |            |   |
|---------------|-------|-------|----|------|------|-------|------------|---|
| QVTQSYWDTNPTR | 789.9 | 703.3 | y6 | 4920 | 7600 | 12520 | 39.2971246 | N |
|---------------|-------|-------|----|------|------|-------|------------|---|

|               |       |       |        |      |      |      |             |   |
|---------------|-------|-------|--------|------|------|------|-------------|---|
| QVTQSYWDTNPTR | 789.9 | 672.3 | b6-H2O | 2580 | 7030 | 9610 | 26.84703434 | N |
|---------------|-------|-------|--------|------|------|------|-------------|---|

|              |       |       |        |       |       |       |             |   |
|--------------|-------|-------|--------|-------|-------|-------|-------------|---|
| LCNNPTPQFGGK | 666.8 | 485.2 | b4-NH3 | 16600 | 14850 | 31450 | 52.78219396 | Y |
|--------------|-------|-------|--------|-------|-------|-------|-------------|---|

|              |       |       |        |      |      |       |             |   |
|--------------|-------|-------|--------|------|------|-------|-------------|---|
| LCNNPTPQFGGK | 666.8 | 683.3 | b6-NH3 | 9510 | 7900 | 17410 | 54.62377944 | Y |
|--------------|-------|-------|--------|------|------|-------|-------------|---|



|                |       |        |              |        |        |        |             |   |
|----------------|-------|--------|--------------|--------|--------|--------|-------------|---|
| LCNNPTPQFGGK   | 666.8 | 831.4  | y8           | 98000  | 24540  | 122540 | 79.97388608 | N |
| LCNNPTPQFGGK   | 666.8 | 633.3  | y6           | 91000  | 7020   | 98020  | 92.83819629 | N |
| LCNNPTPQFGGK   | 666.8 | 1059.5 | y10          | 14400  | 4943   | 19343  | 74.44553585 | N |
| SITLFVQEDR     | 604.3 | 504.3  | y8, 2+       | 37000  | 14460  | 51460  | 71.90050525 | Y |
| SITLFVQEDR     | 604.3 | 397.2  | y6, 2+       | 44200  | 11100  | 55300  | 79.92766727 | Y |
|                | 604.3 | 595.3  | y18-<br>H2O, | 21600  | 193300 | 214900 | 10.0511866  | N |
| SITLFVQEDR     |       |        | 2+           |        |        |        |             |   |
| SITLFVQEDR     | 604.3 | 793.4  | y6           | 117000 | 3384   | 120384 | 97.18899522 | N |
| SITLFVQEDR     | 604.3 | 646.3  | y5           | 64900  | 6140   | 71040  | 91.35698198 | N |
| DCVGDVTENQICNK | 826.3 | 776.4  | y6           | 7480   | 11600  | 19080  | 39.2033543  | Y |
| DCVGDVTENQICNK | 826.3 | 421.2  | y3           | 22400  | 1680   | 24080  | 93.02325581 | Y |
| DCVGDVTENQICNK | 826.3 | 1006.5 | y8           | 9550   | 469    | 10019  | 95.3188941  | N |
| DCVGDVTENQICNK | 826.3 | 1277.6 | y11          | 2940   | 0      | 2940   | 100         | N |
| DCVGDVTENQICNK | 826.3 | 646.3  | b6           | 10600  | 3560   | 14160  | 74.85875706 |   |

|           |       |       |    |        |       |        |             |   |
|-----------|-------|-------|----|--------|-------|--------|-------------|---|
| GFLLLASLR | 495.3 | 672.4 | y6 | 73000  | 0     | 73000  | 100         | Y |
| GFLLLASLR | 495.3 | 318.2 | b3 | 134000 | 0     | 134000 | 100         | Y |
| GFLLLASLR | 495.3 | 446.3 | y4 | 89300  | 13000 | 102300 | 87.29227761 | N |
| GFLLLASLR | 495.3 | 559.4 | y5 | 106000 | 0     | 106000 | 100         | N |
| GFLLLASLR | 495.3 | 544.3 | b5 | 20200  | 4630  | 24830  | 81.35320177 | N |
| AQLYIDCEK | 570.3 | 827.4 | y6 | 37900  | 6020  | 43920  | 86.29326047 | Y |
| AQLYIDCEK | 570.3 | 555   | ?  | 476    | 16700 | 17176  | 2.771308803 | Y |
| AQLYIDCEK | 570.3 | 940.4 | y7 | 31700  | 0     | 31700  | 100         | N |
| AQLYIDCEK | 570.3 | 200.1 | b2 | 93600  | 0     | 93600  | 100         | N |
| AQLYIDCEK | 570.3 | 664.3 | y5 | 27100  | 0     | 27100  | 100         | N |

---

**Supplemental Table 1: The utility of choosing peptides listed as unique in the GPM database when designing MRM transitions.** Table 2 lists GPM-predicted MRM transitions for several peptides from  $\beta$ -Actin (ACTB, Swissprot accession number P60709) and Thrombospondin-1 (THBS1, Swissprot accession number P07996) and their experimentally determined peak areas. For most peptides, the two most intense unique transitions and the three most intense non-unique transitions were monitored. The peptide peak area as a percentage of total peak area seen in the MRM tracing is calculated as an indication of the specificity of the each MRM transition. Whether the peptide is listed as unique in the GPM database is listed in the final column. Overall, the GPM-archived relative fragment ion intensity appears to be a good indicator of the quality of the transition, while the uniqueness of the peptide does not appear to play a major role in contributing to the specificity of the MRM transition.
