# Supplementary material
Source: PubMed Central journal article supplement (PMC2706936)
Supplement: NIHMS81934-supplement-02.pdf [file NIHMS81934-supplement-02.pdf]

| <b>Protein</b> | <b>Peptide Sequence</b> | <b>Q1<br/>m/z</b> | <b>Q3<br/>m/z</b> | <b>Fragment<br/>Type</b> | <b>Predicted<br/>Intensity<br/>(GPM)</b> | <b>Intensity<br/>(Expt.)</b> |
|----------------|-------------------------|-------------------|-------------------|--------------------------|------------------------------------------|------------------------------|
| <b>ACTB</b>    | AGFAGDDAPR              | 560.8             | 630.3             | y6                       | 100                                      | 15                           |
|                |                         |                   | 701.3             | y7                       | 46                                       | 12.2                         |
|                |                         |                   | 343.2             | y3                       | 61                                       | 100                          |
|                |                         |                   | 424.7             | y8 <sup>2+</sup>         | 33                                       | 0                            |
|                |                         |                   | 420.2             | b3                       | 16                                       | 21.7                         |
|                | GYSFTTTAER              | 638.9             | 581.3             | b4-H <sub>2</sub> O      | 20                                       | 35.1                         |
|                |                         |                   | 452.2             | b3                       | 37                                       | 72.2                         |
|                |                         |                   | 678.3             | y6                       | 100                                      | 82.8                         |
|                |                         |                   | 912.4             | y8                       | 77                                       | 100                          |
|                |                         |                   | 577.3             | y5                       | 50                                       | 50.3                         |
|                | SYELPDGQVITIGNER        | 968.0             | 1086.6            | y10                      | 13                                       | 37.3                         |
|                |                         |                   | 706.4             | y13 <sup>2+</sup>        | 30                                       | 1.1                          |
|                |                         |                   | 1298.7            | y12                      | 100                                      | 100                          |

|                  |       |        |                     |     |      |
|------------------|-------|--------|---------------------|-----|------|
|                  |       | 475.2  | y4                  | 65  | 28.2 |
|                  |       | 689.4  | y6                  | 62  | 23.3 |
| HQGVMMVGMGQK     | 730.4 | 393.2  | b2-NH <sub>3</sub>  | 27  | 0.1  |
|                  |       | 566.3  | b4                  | 13  | 100  |
|                  |       | 1050.6 | y9                  | 100 | 0    |
|                  |       | 410.2  | b2-NH <sub>3</sub>  | 52  | 17.2 |
|                  |       | 664.4  | y5                  | 34  | 38.6 |
| TVLSGGTTMYPGIADR | 892.0 | 628.3  | y6                  | 100 | 28.5 |
|                  |       | 1155.6 | b10                 | 37  | 1.9  |
|                  |       | 791.4  | y7                  | 37  | 3.1  |
|                  |       | 345.2  | b2                  | 37  | 100  |
|                  |       | 1023.5 | y9                  | 17  | 24.4 |
| TGIVMDSGDGVTH    | 767.4 | 918.4  | y9                  | 64  | 6.7  |
|                  |       | 499.3  | b4-H <sub>2</sub> O | 20  | 30.6 |
|                  |       | 1017.4 | y10                 | 53  | 9.8  |

|              |                       |       |                     |                                    |      |      |
|--------------|-----------------------|-------|---------------------|------------------------------------|------|------|
|              |                       | 386.2 | b3-H <sub>2</sub> O | 100                                | 100  |      |
|              |                       | 87.3  | y8                  | 38                                 | 21.9 |      |
| <b>THBS1</b> | <b>GFLLLASLR</b>      | 567.3 | 672.4               | y6                                 | 41   | 24.5 |
|              |                       |       | 462.3               | b3                                 | 18   | 100  |
|              |                       |       | 446.3               | y4                                 | 100  | 25.3 |
|              |                       |       | 559.4               | y5                                 | 81   | 8.6  |
|              |                       |       | 688.4               | b5                                 | 77   | 6.7  |
|              | <b>FVFGTTPEDILR</b>   | 769.9 | 742.4               | y6                                 | 100  | 100  |
|              |                       |       | 574.8               | y10 <sup>2+</sup>                  | 79   | 0    |
|              |                       |       | 363.2               | a2                                 | 87   | 16.7 |
|              |                       |       | 688.9               | y12-H <sub>2</sub> O <sup>2+</sup> | 50   | 0    |
|              |                       |       | 565.8               | y10-H <sub>2</sub> O <sup>2+</sup> | 56   | 1.2  |
|              | <b>GGVNDNFQGVLQNV</b> | 880.9 | 1083.5              | b11-H <sub>2</sub> O               | 12   | 8.3  |

|                      |        |        |                                    |     |      |
|----------------------|--------|--------|------------------------------------|-----|------|
|                      |        | 871.4  | b9-H <sub>2</sub> O                | 12  | 6.2  |
|                      |        | 629.4  | y5                                 | 100 | 85.4 |
|                      |        | 913.5  | y8                                 | 47  | 35.4 |
|                      |        | 785.5  | y7                                 | 62  | 100  |
| IPESGGDNSVFDIFELTGAA | 1170.1 | 864.5  | y8                                 | 62  | 40.3 |
| R                    |        |        |                                    |     |      |
|                      |        | 1092.6 | y10                                | 48  | 15.1 |
|                      |        | 1239.6 | y11                                | 100 | 64.3 |
|                      |        | 1041.5 | y20 <sup>2+</sup>                  | 73  | 0    |
|                      |        | 977.5  | y9                                 | 56  | 100  |
| SITLFVQEDR           | 676.4  | 504.3  | y8 <sup>2+</sup>                   | 23  | 1.7  |
|                      |        | 397.2  | y6 <sup>2+</sup>                   | 20  | 21.4 |
|                      |        | 595.3  | y18-H <sub>2</sub> O <sup>2+</sup> | 100 | 2.7  |

|                |       |        |     |     |      |
|----------------|-------|--------|-----|-----|------|
|                |       | 793.4  | y6  | 58  | 100  |
|                |       | 646.3  | y5  | 46  | 24.4 |
| DCVGDVTENQICNK | 908.9 | 909.4  | y6  | 81  | 7.6  |
|                |       | 554.2  | y3  | 50  | 100  |
|                |       | 1130.5 | y8  | 100 | 7.3  |
|                |       | 1410.6 | y11 | 38  | 1.6  |
|                |       | 779.3  | b6  | 38  | 18   |

---

**Supplemental Table 2: A comparison of GPM-predicted fragment ion intensities and experimentally-determined fragment ion intensities from peptides labeled with iTRAQ.** Table 1 lists GPM-predicted MRM transitions for several peptides from  $\beta$ -Actin (ACTB, swissprot accession number P60709) and Thrombospondin-1 (THBS1, swissprot accession number P07996), and compares fragment ion intensity values predicted by the GPM vs experimentally determined intensity values.
